# Supplementary material for: Influence of Personal, Environmental, and Community Factors on Cigarette Smoking in Adolescents: A Population-Based Study from Taiwan
Source: MDPI journal article supplement (doi:10.3390/healthcare10030534), 2022-03-14
Supplement: s1 [file s1]

**Supplement Table 1** Overall indices related to the goodness-of-fit model

| Model Fit Indices        | Acceptable Values | Results |
|--------------------------|-------------------|---------|
| Absolute Fit Indices     |                   |         |
| SRMR                     | <0.05             | 0.0032  |
| RMSEA                    | <0.05             | 0.005   |
| Incremental Fit Indices  |                   |         |
| TLI                      | >0.9              | 0.999   |
| CFI                      | >0.9              | 1.000   |
| Parsimonious Fit Indices |                   |         |
| PGFI                     | >0.5              | 0.225   |

SRMR: Standardized root mean square residual; RMSEA: Root mean square error of approximation;

CFI: Comparative fit Index; GFI: Goodness-of-fit statistic; PGFI: parsimonious goodness-fit-index.

**Supplement Table 2** Validation analysis

| Associated factors                                                | Training model | Testing g model |
|-------------------------------------------------------------------|----------------|-----------------|
|                                                                   | Direct effect  | Direct effect   |
| <b>Positive effect</b>                                            |                |                 |
| Free cigarettes offered by tobacco company (C)                    | 0.176          | 0.189           |
| Home SHS (E)                                                      | 0.153          | 0.154           |
| Friends smoking (E)                                               | 0.104          | 0.103           |
| Pocket money (P)                                                  | 0.075          | 0.086           |
| Outside of home and school SHS (E)                                | 0.054          | 0.069           |
| School SHS (E)                                                    | 0.047          | 0.046           |
| Indigenous population (C)                                         | 0.036          | 0.038           |
| Parents smoking (E)                                               | 0.027          | 0.011           |
| <b>Negative effect</b>                                            |                |                 |
| Feel less comfortable at social occasions while smoking (P)       | -0.251         | -0.219          |
| Feel no difference whether smoking or not at social occasions (P) | -0.188         | -0.149          |
| Female (P)                                                        | -0.069         | -0.066          |
| Feel quitting is hard (P)                                         | -0.051         | -0.043          |
| School anti-smoking education and rules (E)                       | -0.015         | -0.027          |
| Feel Smoke then quit is harmful (P)                               | -0.013         | -0.017          |
